# Supplementary material for: ECG Monitoring Garment Using Conductive Carbon Paste for Reduced Motion Artifacts
Source: MDPI journal article supplement (doi:10.3390/polym9090439), 2017-09-11
Supplement: s1 [file s1]

# Supplementary Materials: ECG Monitoring Garment Using Conductive Carbon Paste for Reduced Motion Artifacts

Jin-Woo Lee and Kwang-Seok Yun

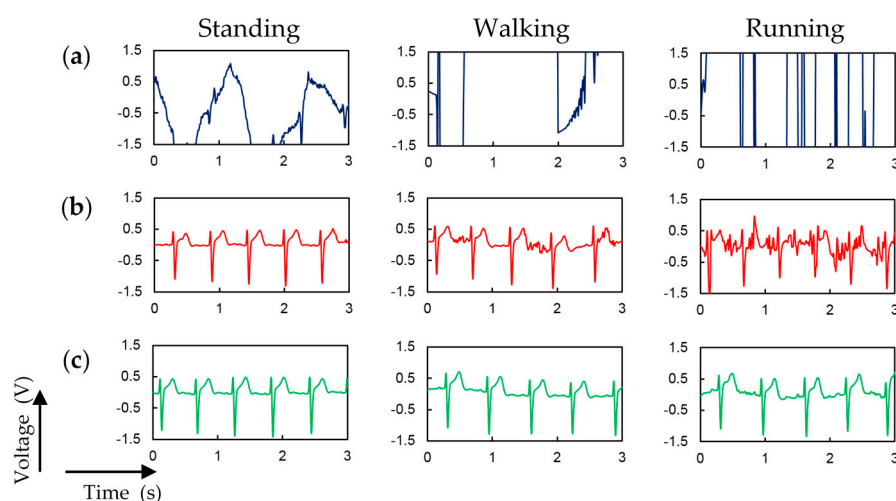

**Figure S1.** Measured ECG signal at three different levels of motion (standing, walking, and running) for second subject by using (a) ECG measurement garment without P-electrodes, (b) Ag/AgCl electrodes, and (c) ECG measurement garment with P-electrodes.

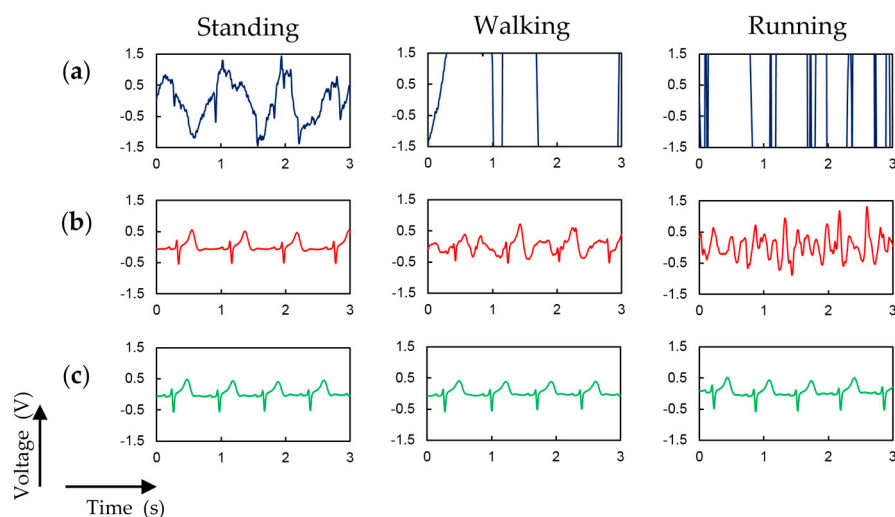

**Figure S2.** Measured ECG signal at three different levels of motion (standing, walking, and running) for third subject by using (a) ECG measurement garment without P-electrodes, (b) Ag/AgCl electrodes, and (c) ECG measurement garment with P-electrodes.

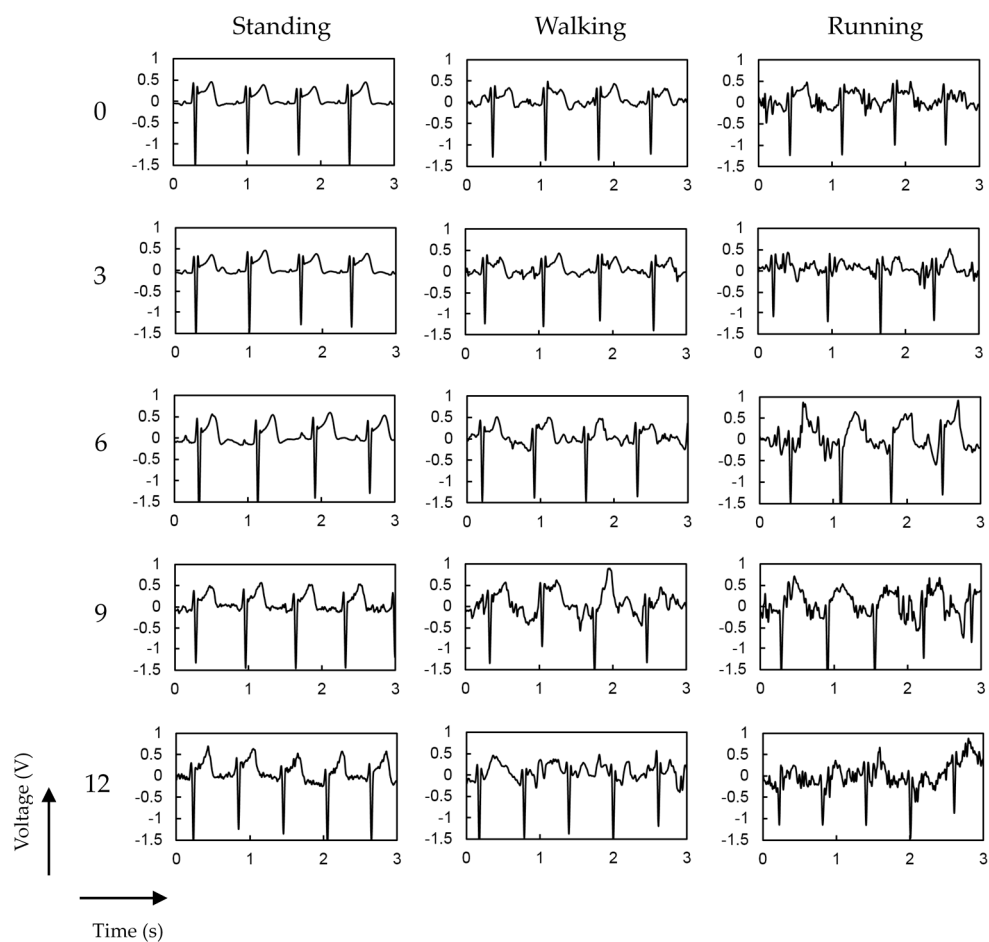

**Figure S3.** ECG signals measured every 3 h for 12 h after application of commercial Ag/AgCl electrodes on skin.
